# Supplementary material for: External Validation of the 4C Mortality Score among COVID-19 Patients Visiting the Emergency Department or admitted to Hospital in Ontario, Canada
Source: Research Square preprint supplement (doi:10.21203/rs.3.rs-268410/v1), 2021-03-11
Supplement: Supplementary file 1 [file 4ddf985f2ef964fcd552f554.docx]

**Supplementary Table S1**: Components of the 4C mortality Score

| **Variable** | **4C Mortality Score** |
| --- | --- |
| Age (years) |  |
| < 50 | - |
| 50-59 | +2 |
| 60-69 | +4 |
| 70-79 | +6 |
| ≥ 80 | +7 |
| Sex |  |
| Female | - |
| Male | +1 |
| Number of comorbidities1 |  |
| 0 | - |
| 1 | +1 |
| ≥ 2 | +2 |
| Respiratory rate (per minute) |  |
| < 20 | - |
| 20-29 | +1 |
| ≥ 30 | +2 |
| Peripheral oxygen saturation (%) |  |
| ≥ 92 | - |
| < 92 | +2 |
| Altered consciousness / confusion |  |
| No | - |
| Yes | +2 |
| Blood urea nitrogen (mmol/L) |  |
| < 7 | - |
| 7-14 | +1 |
| ≥ 14 | +3 |
| C-reactive protein (mg/L) |  |
| < 50 | - |
| 50-99 | +1 |
| ≥ 100 | +2 |
| Note: Adapted from https://www.bmj.com/content/370/bmj.m3339 | |

1. Includes chronic lung disease (excluding asthma), chronic cardiac disease, diabetes, chronic liver disease, chronic kidney disease, chronic neurological disease, cancer, obesity (as defined by staff), rheumatological disease, dementia, and HIV/AIDS.
